# Supplementary material for: Clinical Characteristics and Genetic Etiology of Children With Developmental Language Disorder
Source: Frontiers journal article supplement (doi:10.3389/fped.2021.651995), 2021-07-01
Supplement: Table_1.pdf [file Table_1.pdf]

**Appendix 1:** Specifications of comorbidities in total cohort, children diagnosed with Developmental Language Delay where genetic analyses was performed.

|                          | Children with Developmental Language Delay<br>N= 127, % |
|--------------------------|---------------------------------------------------------|
| Comorbidities            | N= 22                                                   |
| Epilepsy                 | 2 (9.1)                                                 |
| Autism                   | 1 (4.5)                                                 |
| Cleft palate             | 0 (0)                                                   |
| Squint                   | 1 (4.5)                                                 |
| Cardial                  | 4 (18.2)                                                |
| Polycystic kidney        | 0 (0)                                                   |
| Abbreviations: n= number |                                                         |
