# Supplementary material for: Clinical Characteristics and Genetic Etiology of Children With Developmental Language Disorder
Source: Frontiers journal article supplement (doi:10.3389/fped.2021.651995), 2021-07-01
Supplement: Table_2.pdf [file Table_2.pdf]

**Appendix 2:** Specifications of difficulties during pregnancy and perinatal emergency in total cohort, children diagnose with Developmental Language Delay (DLD) were genetic analyses was performed.

|                                | Children with Developmental Language Delay<br>N= 127, % |
|--------------------------------|---------------------------------------------------------|
| Difficulties during pregnancy* | N= 37                                                   |
| Cardiovascular                 | 7 (18.9)                                                |
| Respiratory                    | 1 (2.7)                                                 |
| Endocrine                      | 10 (27.0)                                               |
| Infection                      | 3 (8.1)                                                 |
| Urogenital                     | 1 (2.7)                                                 |
| Pregnancy/childbirth           | 8 (21.6)                                                |
| Musculoskeletal                | 1 (2.7)                                                 |
| Neurologic                     | 1(2.7)                                                  |
| Multiple                       | 5 (13.5)                                                |
| Perinatal emergency *          | N= 11                                                   |
| Cardial                        | 3 (27.3)                                                |
| Respiratory                    | 5 (45.5)                                                |
| Cardial and respiratory        | 3 (27.3)                                                |
| Abbreviations: n= number       |                                                         |

\* Five mothers suffered from pre-eclampsia

Respiratory problems directly after birth scored as perinatal emergency were mostly due to a wrapped umbilical cord (3 patients). Idiopathic respiratory distress syndrome (IRDS) was reported in only one patient. Only one patient suffered from cardiac problems.
