# Supplementary material for: Clinical Characteristics and Genetic Etiology of Children With Developmental Language Disorder
Source: Frontiers journal article supplement (doi:10.3389/fped.2021.651995), 2021-07-01
Supplement: Table_3.pdf [file Table_3.pdf]

**Appendix 3:** Referrer and reason for referral of children diagnosed with Developmental Language Delay (DLD) to geneticist in Wilhelmina Children's Hospital, Utrecht, the Netherlands

| <b>Referrer</b>                                      | <b>N= 127, %</b> |
|------------------------------------------------------|------------------|
| Pediatrician                                         | 75 (59.1)        |
| Pediatric surgeon                                    | 7 (5.5)          |
| Neurologist                                          | 19 (15.0)        |
| ENT specialist                                       | 20 (15.7)        |
| Psychiatrist                                         | 3 (2.4)          |
| Cardiologist                                         | 1 (0.8)          |
| <b>Reason for referral</b>                           | <b>N= 127, %</b> |
| Speech and language delay                            | 39 (30.7)        |
| Developmental disorder                               | 44 (34.6)        |
| Dysmorphological features                            | 2 (1.6)          |
| Epilepsy                                             | 4 (3.1)          |
| Autism                                               | 2 (1.6)          |
| Mental retardation                                   | 12 (9.4)         |
| Hearing loss                                         | 5 (3.9)          |
| Nasal speech                                         | 2 (1.6)          |
| Developmental disorder and dysmorphological features | 5 (3.9)          |
| Learning problems                                    | 3 (2.4)          |
| Congenital abnormalities                             | 4 (3.1)          |
| Abbreviations: n= number                             |                  |
