# Supplementary material for: Clinical Characteristics and Genetic Etiology of Children With Developmental Language Disorder
Source: Frontiers journal article supplement (doi:10.3389/fped.2021.651995), 2021-07-01
Supplement: Table_4.pdf [file Table_4.pdf]

| Appendix 4: Performed hearing/language/intelligence tests in children with DLD                                                                                                                                                                                                                                                        |                                |                                           |                                 |                               |
|---------------------------------------------------------------------------------------------------------------------------------------------------------------------------------------------------------------------------------------------------------------------------------------------------------------------------------------|--------------------------------|-------------------------------------------|---------------------------------|-------------------------------|
| Test                                                                                                                                                                                                                                                                                                                                  | Subtest                        | Domain                                    | Age                             | Average range                 |
| Hearing                                                                                                                                                                                                                                                                                                                               |                                |                                           |                                 |                               |
| Tonal audiometry                                                                                                                                                                                                                                                                                                                      |                                | Hearing level                             | ≥4 years                        | ≤ 20 dB PTA (0.5-2 kHz)       |
| VRA                                                                                                                                                                                                                                                                                                                                   | - headphone<br>- free field    |                                           | 7 months -3 years<br>< 7 months | ≤ 15 dB<br>≤ 25 dB<br>≤ 30 dB |
| BOA                                                                                                                                                                                                                                                                                                                                   |                                |                                           |                                 | *                             |
| ABR                                                                                                                                                                                                                                                                                                                                   |                                |                                           | ≤1 year                         | ≤ 20 dB                       |
| Language                                                                                                                                                                                                                                                                                                                              |                                |                                           |                                 |                               |
| Schlichting test (TBQ)                                                                                                                                                                                                                                                                                                                | -                              | Language perception                       | 2-7 years                       | 85-115                        |
| Schlichting test                                                                                                                                                                                                                                                                                                                      | Vocabulary (WQ)                | Vocabulary                                | 2-7 years                       | 85-115                        |
| Clinical Evaluation of Language Fundamentals Version IV(CELF-IV)                                                                                                                                                                                                                                                                      | Receptive language index (RTI) | Language perception                       | 5-18 years                      | 85-115                        |
|                                                                                                                                                                                                                                                                                                                                       | Vocabulary (AW)                | Vocabulary                                |                                 |                               |
| Development/intelligence                                                                                                                                                                                                                                                                                                              |                                |                                           |                                 |                               |
| Bayley Scales of Infant and Toddler Development (BSID)                                                                                                                                                                                                                                                                                |                                | developmental index cognitive scale       | 1-42 months                     | 90-110                        |
| Snijders-Oomen Non-verbal Intelligence test (SON-R)                                                                                                                                                                                                                                                                                   |                                | Non-verbal intelligence                   | 2-7 years                       | 90-110                        |
| Wechsler Non-Verbal Scale of Ability (WNV-NL)                                                                                                                                                                                                                                                                                         |                                | Non-verbal intelligence                   | 4-21 years                      | 90-110                        |
| Wechsler Intelligence Scale for Children (WISC)                                                                                                                                                                                                                                                                                       |                                | Intelligence general intellectual ability | 6-18 years                      | 90 – 109                      |
| Abbreviations: PTA; Pure tone average. dB; decibel. VRA; Visual reinforcement audiometry, BOA; behavioural observation audiometry, ABR; Auditory Brainstem evoked Responses.<br>*limits for hearing levels by BOA testing for sufficient hearing to develop a normal speech and language were according to Williams and Wilkins (23); |                                |                                           |                                 |                               |
